## Pre-stroke physical activity matters for functional limitations: A longitudinal case-control study of 12,860 participants

Zack van Allen, MBA, PhD<sup>1,2,†</sup>, Dan Orsholits, PhD<sup>1,†</sup>, Matthieu P. Boisgontier, PT, PhD<sup>1,2,3,\*</sup>

<sup>1</sup>School of Rehabilitation Sciences, Faculty of Health Sciences, University of Ottawa, Canada

<sup>2</sup>Perley Health Centre of Excellence in Frailty-Informed Care, Ottawa, Canada

<sup>3</sup>School of Human Kinetics, Faculty of Health Sciences, University of Ottawa, Canada

<sup>†</sup>Co-first author; <sup>\*</sup>Corresponding author: [matthieu.boisgontier@uottawa.ca](mailto:matthieu.boisgontier@uottawa.ca)

### ABSTRACT

**Objective.** In the chronic phase after a stroke, limitations in activities of daily living (ADLs) and instrumental ADL (IADLs) initially plateau before steadily increasing. The benefits of pre-stroke physical activity on these limitations remain unclear. To clarify this relationship, we examined the effect of physical activity on the long-term evolution of functional limitations in a cohort of stroke survivors and compared it to a cohort of matched stroke-free adults.

**Methods.** Longitudinal data from 2,143 stroke survivors and 10,717 stroke-free adults aged 50 years and older were drawn from a prospective cohort study based on the Survey of Health, Ageing and Retirement in Europe (2004-2022; 8 data collection waves). Physical activity was assessed in the pre-stroke wave. Functional limitations were assessed in the post-stroke waves. Each stroke survivor was matched with 5 stroke-free adults who had similar propensity scores computed on the basis of key covariates, including baseline age, sex, body mass index, limitations in ADL and IADL, chronic conditions and country of residence, before any of the participants from either cohort had experienced a stroke.

**Results.** Results showed an interaction between stroke status and physical activity on ADL limitations ( $b = -0.076$ ; 95% CI =  $-0.142$  to  $-0.011$ ), with the effect of physical activity being stronger in stroke survivors ( $b = -0.345$ , 95% CI =  $-0.438$  to  $-0.252$ ) than in stroke-free adults ( $b = -0.269$ , 95% CI =  $-0.269$  to  $-0.241$ ).

**Conclusion.** The beneficial effect of pre-stroke physical activity on ADL limitations after stroke is stronger than its effect in matched stroke-free adults followed for a similar number of years.

**Impact.** Physical activity, an intervention within the physical therapist's scope of practice, is effective in reducing the risk of functional dependence after stroke. Moreover, pre-stroke levels of physical activity can inform the prognosis of functional dependence in stroke survivors.

**Keywords:** Cohort Studies, Comorbidity, Disability, Exercise, Functional Status, Health Behavior, Longitudinal Studies, Prognosis, Prospective Studies, Stroke Survivors

**Nonstandard abbreviations and acronyms:** ADL, activities of daily living; IADL, instrumental activities of daily living; SHARE, Survey of Health, Ageing and Retirement in Europe.

**Ethical approval:** This study was part of the Survey of Health, Ageing and Retirement in Europe (SHARE), which was approved by the relevant research ethics committees. The University of Ottawa's Office of Research Ethics and Integrity has formally confirmed that the study does not require review by a Research Ethics Board because it relies exclusively on publicly available information that is legally available to the public and appropriately protected by law. All participants provided written informed consent.

## INTRODUCTION

The prevalence of stroke exceeds 100 million cases worldwide<sup>1</sup>. On average, each of these cases is associated with a loss of 1.4 years of full health<sup>1,2</sup>. Over the past three decades, the number of years of full health lost to stroke has increased by an average of 1.2 million per year<sup>1</sup>. This burden on stroke survivors is reflected in their functional limitations. Specifically, one year after a stroke, survivors experience at least slight (59%)<sup>3-17</sup>, moderate (33%)<sup>13-28</sup>, or severe (23%)<sup>11-13,15-20</sup> dependency in activities of daily living (ADLs), such as dressing, walking, bathing, eating, and toileting (Supplemental Tables S1 to S3). Regarding instrumental ADLs (IADLs), 40%<sup>9,10,16,19,20</sup> of stroke survivors are moderately active and 41%<sup>16,17,19-21</sup> are inactive in household, leisure, work, and outdoor activities at 1 year (Supplemental Tables S4 and S5). Whether limitations in I/ADLs (ADLs and IADLs) plateau<sup>10,13,21,28,29</sup> or increase<sup>11,12,19</sup> in subsequent years depends on several factors, including age<sup>11,12,29,30</sup>, type of health insurance<sup>11</sup>, and severity of disability 1 to 2 years after stroke<sup>12</sup>.

The level of physical activity has been suggested as one of the factors influencing functional limitations after stroke<sup>31</sup>. Regarding ADLs, some studies have found an association between higher pre-stroke physical activity and lower post-stroke limitations in ADLs<sup>22,32-37</sup>. Specifically, higher pre-stroke physical activity was associated with higher independence in ADLs during the first<sup>22, 32-36</sup> and second year<sup>37</sup> after stroke. However, other studies found no evidence of this association between physical activity and functional independence in ADLs<sup>38-41</sup>. These mixed results could be explained by the use of a single-item rating scale<sup>22,32,33,35-41</sup>, the Modified Rankin Scale, which has been shown to be less reliable and more subjective than questionnaires assessing specific I/ADLs<sup>42</sup>. In addition, only one prospective study has examined the effect of pre-stroke physical activity on IADLs<sup>30</sup>. This study focused on vigorous physical activity and was based on a cohort of adults who were stroke-free at baseline. The results showed that higher vigorous physical activity at baseline was associated with a higher probability of being independent in I/ADLs after stroke, but this difference was similar before stroke. This result led the authors to conclude that “being physically active does not protect against the disabling effects of a stroke” on I/ADLs. Building on this previous study, we used a different approach by comparing the effect of physical activity on I/ADLs in a larger sample of stroke survivors ( $n = 2,143$  vs.  $1,374$ ) with a sample of stroke-free adults matched for key covariates ( $n = 10,717$ ). In addition, because moderate-intensity physical activity has been suggested to be at least as beneficial for brain plasticity as vigorous-intensity physical activity<sup>43,44</sup>, both intensities were included in our study.

The objective of this longitudinal case-control study was to examine the effect of pre-stroke physical activity on post-stroke functional limitations. We hypothesized that higher levels of pre-stroke physical activity would reduce post-stroke functional limitations in a cohort of stroke survivors. We further hypothesized that this beneficial effect of physical activity would be weaker in a cohort of stroke-free participants matched for baseline (i.e., before any of the stroke survivors had experienced a stroke) age, sex, body mass index, I/ADL limitations, and country of residence over a similar number of follow-up years, because stroke survivors are likely to have more functional limitations from which to recover.

## METHODS

### Study Sample and Design

Data were drawn from the Survey of Health, Ageing and Retirement in Europe (SHARE), a longitudinal population-based study of over 140,000 adults aged 50 years and older living in 28 European countries and one Middle East country<sup>45</sup>. Data were collected every 2 years between 2004 and 2022 for a total of 8 waves of measurement using computer-assisted personal interviewing (CAPI) in the participants' homes. Physical activity, stroke events, and functional independence (ADLs, IADLs) were assessed at all measurement waves except wave 3 (2008-2009). To be included in the present study, participants had to be 50 years of age or older, have no reported history of stroke prior to study entry, and have participated in at least 4 waves. SHARE was conducted in accordance with the Declaration of Helsinki and approved by the Ethics Committee of the University of Mannheim (waves 1-4) and the Ethics Council of the Max Planck Society (waves 4-8). All participants gave written informed consent.

### Measures

#### *Outcome Variable: Post-Stroke Functional Limitations*

Functional dependence was assessed using the number of functional limitations in six ADLs (dressing, walking, bathing, eating, getting in and out of bed, and using the toilet) and seven IADLs (using a map, preparing a hot meal, shopping for groceries, making telephone calls, taking medication, gardening or doing housework, and managing money)<sup>46,47</sup>. Participants were presented with each activity and instructed to indicate whether they “have any difficulty with these activities because of a physical, mental, emotional or memory problem” (yes vs. no) and to “exclude any difficulties they expected to last less than three months”. A score representing the total number of functional dependencies was computed for ADLs (0-6) and IADLs (0-7), with higher scores indicating greater functional dependence.

#### *Explanatory Variables: Stroke and Physical Activity*

Information on stroke status during follow-up was collected at each wave using the following question: “Has a doctor told you that you have any of the conditions on this card [indicating history of health conditions including stroke]?”<sup>12</sup>.

Level of physical activity at entry in SHARE was derived from two questions: “How often do you engage in vigorous physical activity, such as sports, heavy housework, or a job that involves physical labor?” and “How often do you engage in activities that require a low or moderate level of energy such as gardening, cleaning the car, or doing a walk?”<sup>47-52</sup>. Participants responded on a four-point scale: 1 = Hardly ever or never; 2 = One to three times a month; 3 = Once a week; 4 = More than once a week. Participants who answered “more than once a week” to at least one of the questions were classified as physically active, whereas the other participants were classified as physically inactive to reduce a potential misclassification bias in which physically inactive participants would be incorrectly classified as physically active.

#### *Covariates*

Models were adjusted for baseline age, sex (male, female), time (survey waves), quadratic time, number of chronic conditions (none or 1 vs. 2 or more), and level of education (primary or less, secondary, tertiary), which has been shown to be associated with physical activity levels<sup>48,51,53-57</sup>.

## Data Preprocessing

### *Matching Procedure*

To select matched samples of stroke survivors and stroke-free participants with similar distributions of key covariates, a matching procedure based on the nearest neighbor method was conducted using the MatchIt R package<sup>58,59</sup> with propensity scores obtained with a generalized linear model. This matching procedure used a 1:5 ratio to create groups including one stroke survivor and five stroke-free adults with similar propensity scores, thereby reducing the potential bias introduced by covariates. Propensity scores were calculated using the characteristics of the participants at their first SHARE interview, when none of them had experienced a stroke: Age, sex, number of chronic conditions (none or 1 vs. 2 or more), limitations in I/ADL, body mass index category [underweight (<18.5 kg/m<sup>2</sup>), normal (reference; 18.5 to 24.9 kg/m<sup>2</sup>), overweight (25 to 29.9 kg/m<sup>2</sup>), obese (30 kg/m<sup>2</sup> and above)], country of residence, number of measurement waves, and wave number of the first interview.

### *Temporal Alignment of Data on the First Post-Stroke Wave*

Using the lag() function of the dplyr R package, which allows the temporal alignment of the measurement waves to be shifted, the first wave in which a stroke was reported was set as Wave 1 in the analyses. Baseline data from stroke survivors used in the matching procedure (see below) were data collected during the wave preceding this Wave 1.

## Statistical Analyses

Data were analyzed using linear mixed-effects models, which account for the nested structure of the data (i.e., repeated measures over time within a single participant), allow the use of incomplete and unbalanced data, and provide acceptable Type I error rates<sup>60,61</sup>. Models were built and fitted by maximum likelihood in R programming language<sup>62</sup> using the lme4<sup>63</sup> and lmerTest<sup>64</sup> packages. P-values were approximated using Satterthwaite method<sup>64</sup>. The effects of baseline physical activity on future I/ADL were compared between stroke survivors and stroke-free adults. The number of post-stroke measurement waves varied between participants in the stroke group and was matched to the number of measurement waves in the stroke-free adults. To examine the effect of pre-stroke physical activity on functional independence in stroke survivors and stroke-free adults, two dependent variables were tested: ADL and IADL limitations. The fitted models included stroke (stroke vs. no stroke), physical activity (active vs. inactive at baseline), linear time, quadratic time, and the covariates as fixed effects. The random structure included random intercepts for participants and for participants grouped together by the matching process, as well as random linear and quadratic slopes of wave within each participant<sup>61</sup>. These random effects estimated the functional independence of each participant and each matching group, as well as the rate of change of this independence across waves. The quadratic effect of wave was added to account for the potential accelerated (or decelerated) decline in functional independence across waves. An interaction term between stroke and physical activity conditions was added to formally test the moderating effect of stroke on the association between physical activity and functional dependence. In addition, interaction terms between stroke and wave (linear and quadratic) conditions were included to allow variations in I/ADL trajectories between the two groups. In summary, the equation of our models was as follows:

### Functional Limitation<sub>ij</sub>

$$\begin{aligned} &= \beta_0 + \beta_1 \text{Stroke Status}_j + \beta_2 \text{Baseline Physical Activity}_j \\ &+ \beta_3 (\text{Stroke Status}_j \times \text{Baseline Physical Activity}_j) + \beta_4 \text{Wave}_{ij} \\ &+ \beta_5 (\text{Stroke Status}_j \times \text{Wave}_{ij}) + \beta_6 \text{Quadratic Wave}_{ij} \\ &+ \beta_7 (\text{Stroke Status}_j \times \text{Quadratic Wave}_{ij}) + \beta_8 \text{Baseline Age}_j + \beta_9 \text{Sex}_j \\ &+ \beta_{10} \text{Education Primary}_j + \beta_{11} \text{Education Tertiary}_j \\ &+ \beta_{12} \text{Chronic Health Conditions}_j + u_{0j} + u_{k(j)} + u_{1j} \times \text{Wave}_{ij} \\ &+ u_{2j} \times \text{Quadratic Wave}_{ij} + \epsilon_{ij} \end{aligned}$$

In this equation, *Functional Limitation<sub>ij</sub>* is the *j*<sup>th</sup> participant's number of limitations in ADLs or IADLs in condition *i*, the  $\beta$ s are the fixed effect coefficients,  $u_{0j}$  is the random intercept for the *j*<sup>th</sup> participant,  $u_{1j}$  is the random slope of the wave for the *j*<sup>th</sup> participant,  $u_{2j}$  is the random slope of the quadratic wave for the *j*<sup>th</sup> participant,  $u_{k(j)}$  is a random intercept with *k(j)* coding for the matching group of the *j*<sup>th</sup> participant, the random effects are allowed to correlate freely (unstructured covariance matrix), and  $\epsilon_{ij}$  is the error term.

### Sensitivity Analysis

In a sensitivity analysis, participants who responded “hardly ever or never” to one of the two physical activity questions were classified as physically inactive, whereas the other participants were classified as physically active. This categorization reduced a potential misclassification bias in which physically active participants would be incorrectly classified as physically inactive.

## RESULTS

### Descriptive Results

The study sample included 2,143 stroke survivors (mean age: 66.9 ± 9.1 years; 1,052 females) and 10,717 stroke-free adults (mean age: 66.9 ± 9.3 years, 5,126 females) from the SHARE study, whose characteristics at baseline are summarized in Table 1.

In stroke survivors, the average level of functional limitation at the first wave after stroke was 0.17 for ADLs and 0.28 for IADLs and increased to 1.05 and 1.72 at the eighth wave after stroke, respectively (Supplemental Table S6). In stroke-free adults, the average level of functional limitation on the first wave after stroke was 0.15 for ADLs and 0.25 for IADLs and increased to 0.41 and 0.73 on the eighth wave after stroke, respectively (Supplemental Table S6). The similar level of functional limitation between groups at the first poststroke wave was expected because the propensity score used for the matching procedure included the number of I/ADL limitations at baseline.

At baseline, 258 stroke survivors engaged in moderate physical activity “hardly ever or never”, 127 “one to three times a month”, 274 “once a week”, and 1,500 “more than once a week” (Supplemental Table S7). In addition, 951 engaged in vigorous physical activity “hardly ever or never”, 216 “one to three times a month”, 306 “once a week”, and 706 “more than once a week” (Supplemental Table S7). In total, 1,564 stroke survivors were considered physically active (i.e., answered “more than once a week” to at least one of the two questions) and 595 were considered physically inactive (Supplemental Table S8).



**Table 1.** Baseline characteristics of the participants at their first interview for the Survey of Health, Ageing and Retirement in Europe (SHARE), when none of them had experienced a stroke, stratified by stroke-related status in the following waves.

| Variables                                 | Stroke Survivors<br>(N = 2,143) | Matched Stroke-Free Adults<br>(N = 10,717) |
|-------------------------------------------|---------------------------------|--------------------------------------------|
| Age, mean (SD)                            | 66.9 (9.1)                      | 66.9 (9.3)                                 |
| <b>Sex</b>                                |                                 |                                            |
| Female, n (%)                             | 1052 (49.1)                     | 5126 (47.8)                                |
| Male, n (%)                               | 1091 (50.9)                     | 5591 (52.2)                                |
| <b>Physical Activity</b>                  |                                 |                                            |
| Physically active, n (%)                  | 1564 (72.5)                     | 8060 (74.6)                                |
| Physically inactive, n (%)                | 595 (27.4)                      | 2720 (25.2)                                |
| <b>Functional Limitations</b>             |                                 |                                            |
| ADL, mean (SD)                            | 0.2 (0.6)                       | 0.2 (0.7)                                  |
| IADL, mean (SD)                           | 0.3 (0.8)                       | 0.3 (0.9)                                  |
| <b>Body Mass Index (kg/m<sup>2</sup>)</b> |                                 |                                            |
| < 18.5 – Underweight, n (%)               | 155 (1.5)                       | 590 (1.1)                                  |
| 18.5-24.9 – Normal, n (%)                 | 3445 (33.9)                     | 16275 (31.7)                               |
| 25-29.9 – Overweight, n (%)               | 4176 (41.0)                     | 22856 (44.5)                               |
| ≥ 30 – Obese, n (%)                       | 2401 (23.6)                     | 11647 (22.7)                               |
| <b>Chronic Condition</b>                  |                                 |                                            |
| < 2, n (%)                                | 3423 (32.7)                     | 22807 (43.5)                               |
| ≥ 2, n (%)                                | 7053 (67.3)                     | 29676 (56.5)                               |
| <b>Education</b>                          |                                 |                                            |
| Primary, n (%)                            | 666 (31.1)                      | 3027 (28.2)                                |
| Secondary, n (%)                          | 1081 (50.4)                     | 5415 (50.5)                                |
| Tertiary, n (%)                           | 396 (18.5)                      | 2275 (21.2)                                |
| <b>Country</b>                            |                                 |                                            |
| Austria, n (%)                            | 147 (6.9)                       | 764 (7.1)                                  |
| Belgium, n (%)                            | 193 (9.0)                       | 965 (9.0)                                  |
| Czech Republic, n (%)                     | 160 (7.5)                       | 818 (7.6)                                  |
| Denmark, n (%)                            | 170 (7.9)                       | 810 (7.6)                                  |
| Estonia, n (%)                            | 154 (7.2)                       | 870 (8.1)                                  |
| France, n (%)                             | 161 (7.5)                       | 815 (7.6)                                  |
| Germany, n (%)                            | 153 (7.1)                       | 831 (7.8)                                  |
| Greece, n (%)                             | 106 (4.9)                       | 506 (4.7)                                  |
| Israel, n (%)                             | 95 (4.4)                        | 460 (4.3)                                  |
| Italy, n (%)                              | 161 (7.5)                       | 768 (7.2)                                  |
| Luxembourg, n (%)                         | 20 (0.9)                        | 94 (0.9)                                   |
| Netherlands, n (%)                        | 81 (3.8)                        | 384 (3.6)                                  |
| Poland, n (%)                             | 73 (3.4)                        | 368 (3.4)                                  |
| Slovenia, n (%)                           | 76 (3.5)                        | 379 (3.5)                                  |
| Spain, n (%)                              | 141 (6.6)                       | 673 (6.3)                                  |
| Sweden, n (%)                             | 167 (7.8)                       | 812 (7.6)                                  |
| Switzerland, n (%)                        | 85 (4.0)                        | 404 (3.8)                                  |

Notes. ADL = activities of daily living, IADL = instrumental activities of daily living, SD = standard deviation.

## Statistical Results

Results of the mixed-effects models showed an interaction effect between stroke status and physical activity on ADL limitations ( $b = -0.076$ , 95% confidence interval [CI]: -0.142 to -0.011,  $p = 0.022$ ; Table 2, Figure 1). The simple effects of the terms in this interaction confirmed that the effect of physical activity was stronger in stroke survivors ( $b = -0.345$ , 95% CI: -0.438, -0.252,  $p$

$< 2.0 \times 10^{-16}$ ) than in stroke-free adults ( $b = -0.269$ , 95% CI:  $-0.296$  to  $-0.241$ ,  $p < 2.0 \times 10^{-16}$ ), with physically active participants (i.e., physical activity  $>$  once a week) showing fewer limitations in ADLs than physically inactive participants (i.e., physical activity  $\leq$  once a week). Similarly, a main effect showed that physically active participants showed fewer limitations in IADLs ( $b = -0.410$ , 95% CI:  $-0.445$  to  $-0.375$ ,  $p < 2.0 \times 10^{-16}$ ; Table 2, Figure 1). However, results showed no evidence of an interaction effect of stroke status and physical activity on limitations in IADLs ( $b = -0.057$ , 95% CI:  $-0.140$  to  $0.026$ ,  $p = 0.178$ ; Table 2, Figure 1).

An interaction between stroke status and quadratic wave indicated that limitations in ADLs ( $b = 0.015$ , 95% CI:  $0.011$  to  $0.018$ ,  $p = 4.9 \times 10^{-13}$ ) and IADLs ( $b = 0.020$ , 95% CI:  $0.015$  to  $0.025$ ,  $p = 3.9 \times 10^{-15}$ ) increased across waves at a higher rate in stroke survivors than in stroke-free adults (Figure 1).

Results of the sensitivity analyses based on a different threshold for classifying physically active (i.e., physical activity  $\geq$  once a month) and inactive participants (i.e., hardly ever or never active) were consistent with the results of the main analyses (Supplemental Table S9; Supplemental Figure S1).

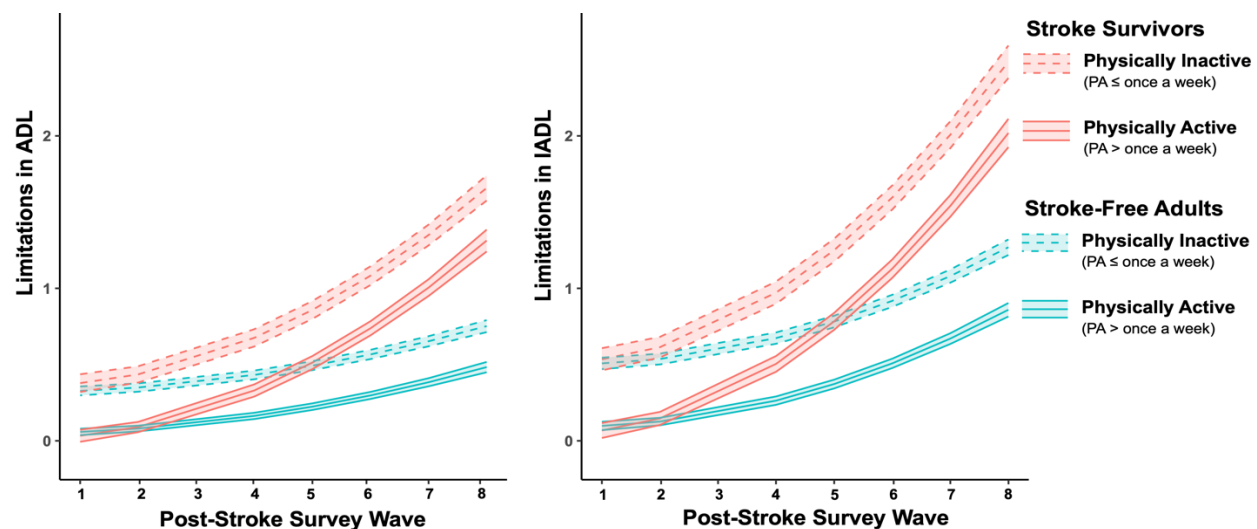

**Figure 1.** Effect of physical activity ( $PA \leq$  once a week vs.  $PA >$  once a week) on limitations in activities of daily living (ADL, left panel) and instrumental activities of daily living (IADL, right panel) in stroke survivors and matched stroke-free adults.

## DISCUSSION

### Main Results

The objective of this longitudinal case-control study was to examine the effect of pre-stroke physical activity on post-stroke functional limitations in stroke survivors and matched stroke-free adults. Consistent with our hypothesis, the results suggest that the beneficial effect of pre-stroke physical activity on post-stroke ADL limitations is stronger than its effect in stroke-free adults matched for age, sex, body mass index, limitations in I/ADLs, number of chronic conditions, and country of residence, number of measurement waves, and wave number of the first interview.

**Table 2.** Results of the mixed-effects models testing the interaction between stroke-related status and physical activity (PA; once a week or less vs. more than once a week) on limitations in activities of daily living (ADL) and instrumental activities of daily living (IADL).

| Exposures                  | ADL                       |                         | IADL                      |                         |
|----------------------------|---------------------------|-------------------------|---------------------------|-------------------------|
|                            | b (95 CI)                 | p                       | b (95 CI)                 | p                       |
| Intercept                  | -0.379 (-0.472 to -0.286) | $1.3 \times 10^{-15}$   | -0.849 (-0.971 to -0.727) | $< 2.0 \times 10^{-16}$ |
| Stroke                     | 0.051 (-0.011 to 0.113)   | 0.105                   | 0.027 (-0.050 to 0.104)   | 0.495                   |
| Physical Activity          | -0.269 (-0.296 to -0.241) | $< 2.0 \times 10^{-16}$ | -0.410 (-0.445 to -0.375) | $< 2.0 \times 10^{-16}$ |
| Wave                       | 0.016 (0.005 to 0.027)    | 0.005                   | 0.015 (0.001 to 0.029)    | 0.030                   |
| Wave <sup>2</sup>          | 0.006 (0.005 to 0.008)    | $5.7 \times 10^{-15}$   | 0.013 (0.011 to 0.015)    | $< 2.0 \times 10^{-16}$ |
| Age                        | 0.008 (0.007 to 0.009)    | $< 2.0 \times 10^{-16}$ | 0.014 (0.013 to 0.016)    | $< 2.0 \times 10^{-16}$ |
| Sex                        | 0.073 (0.051 to 0.095)    | $1.1 \times 10^{-10}$   | 0.204 (0.175 to 0.232)    | $< 2.0 \times 10^{-16}$ |
| Education                  |                           |                         |                           |                         |
| Primary (vs. Secondary)    | 0.115 (0.090 to 0.141)    | $< 2.0 \times 10^{-16}$ | 0.219 (0.187 to 0.251)    | $< 2.0 \times 10^{-16}$ |
| Tertiary (vs. Secondary)   | -0.024 (-0.053 to 0.004)  | 0.094                   | -0.043 (-0.079 to -0.007) | 0.020                   |
| Chronic Conditions         | 0.115 (0.101 to 0.130)    | $< 2.0 \times 10^{-16}$ | 0.180 (0.162 to 0.198)    | $< 2.0 \times 10^{-16}$ |
| Stroke × Physical Activity | -0.076 (-0.142 to -0.011) | 0.022                   | -0.057 (-0.140 to 0.026)  | 0.178                   |
| Stroke × Wave              | 0.020 (-0.006 to 0.047)   | 0.128                   | 0.031 (-0.002 to 0.064)   | 0.066                   |
| Stroke × Wave <sup>2</sup> | 0.015 (0.011 to 0.018)    | $4.9 \times 10^{-13}$   | 0.020 (0.015 to 0.025)    | $3.9 \times 10^{-15}$   |

Notes. 95 CI = 95% confidence interval, ADL = activities of daily living, IADL = instrumental activities of daily living

### Comparison With Other Studies

Our results in stroke survivors showed that higher levels of pre-stroke physical activity were associated with fewer ADL limitations, which is consistent with the existing literature<sup>22,32-37</sup>. Most importantly, our results reveal that the effect of pre-stroke physical activity on ADL limitations after stroke is statistically stronger than its effect in matched stroke-free adults. Although the study by Ris et al.<sup>30</sup> also examined the effect of physical activity in both stroke survivors and stroke-free adults (without the matching procedure we conducted), this potential interaction effect was not considered. Several mechanisms could explain how physical activity improves functional independence after stroke, such as an association between pre- and post-stroke physical activity. Previous studies have shown that this level of physical activity is similar in 41 to 42% of stroke survivors activity<sup>66,67</sup>. Post-stroke engagement in physical activity could increase brain plasticity processes such as angiogenesis, synaptogenesis, and neurogenesis, primarily through the upregulation of growth factors (e.g., brain-derived neurotrophic factor; BDNF)<sup>68-70</sup>. However, the same studies also showed that 33 to 39% of stroke survivors reported lower levels of physical activity after stroke compared to before stroke, and 20 to 25% reported higher levels of physical activity<sup>66,67</sup>. Another explanation could be the beneficial effect of pre-stroke physical activity on depression<sup>66</sup>, which has been shown to be associated with ADL limitations<sup>47,71,72</sup>.

### Strengths and Limitations

The present study has several strengths including results presented for a long follow-up period (up to 16 years) and a large international post-stroke population (17 countries), which allowed us to robustly examine the effects of physical activity on I/ADL limitations. The number of I/ADL limitations was used to assess changes in functional limitation over time, which is more reliable than single-item ratings and more sensitive to identifying differences in functional



trajectories between stroke survivors and stroke-free adults. Sensitivity results using a different categorization of physical activity were consistent with the main results.

However, our results should be considered in the light of several limitations. (1) There was a lack of information on stroke characteristics, which is common in and inherent to large-scale longitudinal studies. Differences in stroke subtypes (i.e., ischemic, hemorrhagic, cryptogenic, transient ischemic attack) or in the type of impairment resulting from the stroke (e.g., motor, sensory, visual, cognitive) may partly explain the discrepancy in our findings between ADL and IADL. The different behaviors that comprise ADL (which rely more on basic motor functions) and IADL (which rely more on cognitive functions) may interact with stroke characteristics. However, data specifying stroke characteristics is not available in SHARE. Future studies should be supported by medical records to provide a more specific understanding of the relationship between physical activity and specific aspects of functional independence by stroke characteristics. (2) The outcome (i.e., stroke) was self-reported. Therefore, a memory bias cannot be excluded. However, the agreement between self-reported stroke and medical records ranges from 79%<sup>73</sup> to 96%<sup>74</sup>. (3) Physical activity was self-reported, which may not have accurately captured the actual levels of physical activity, as correlations between self-report and direct measures of physical activity are low to moderate<sup>75,76</sup>. Future studies should assess physical activity using device-based measures, which have been shown to have greater validity and reliability<sup>77</sup>.

## Conclusions

Our results support a stronger long-term beneficial effect of physical activity on independence in ADLs in stroke survivors compared with stroke-free adults. These findings underscore the beneficial role of moderate-to-vigorous physical activity in mitigating stroke-related limitations in ADLs. In addition, these findings highlight the need to consider the pre-stroke levels of physical activity in the prognosis of stroke-related functional independence.

As movement specialists and primary care practitioners, physical therapists are key healthcare professionals in the prevention of physical inactivity, which falls within their scope of practice<sup>78,79</sup>. As such, the expertise of physical therapists should be used to help people achieve the recommendations of physical activity, thereby optimizing their functional independence in the event of a stroke. While physical therapists feel confident in providing general advice to patients and clients about a physically active lifestyle and suggesting specific physical activity programs, they also perceive some barriers in providing this comprehensive care, including the lack of time, counseling skills, and reimbursement<sup>80</sup>. Such reimbursement may lead to the emergence of certified clinical specialists who can develop more in-depth knowledge and skills related to physical inactivity.

## ARTICLE INFORMATION

### Acknowledgements

Based on the Contributor Roles Taxonomy (CRediT)<sup>81,82</sup>, individual author contributions to this work are as follows: Zack van Allen: Formal Analysis; Visualization; Data Curation; Writing – Review and Editing; Dan Orsholits: Methodology; Formal Analysis; Visualization; Data Curation; Writing – Review and Editing; Matthieu P. Boisgontier: Conceptualization; Methodology; Formal Analysis; Visualization; Data Curation; Writing – Original Draft; Writing – Review and Editing; Supervision; Project Administration; Funding Acquisition.

### Funding

Dr Boisgontier is supported by the Canada Foundation for Innovation (CFI), Mitacs, and the Banting Research Foundation. Zack van Allen is supported by a Mitacs-Banting Discovery Postdoctoral Fellowship. The SHARE data collection was primarily funded by the European Commission through FP5 (QLK6-CT-2001-00360), FP6 (SHARE-I3: RII-CT-2006-062193, COMPARE: CIT5-CT-2005-028857, SHARELIFE: CIT4-CT-2006-028812) and FP7 (SHARE-PREP: no.211909, SHARE-LEAP: no.227822, SHARE M4: no.261982). Additional funding from the German Ministry of Education and Research, the Max Planck Society for the Advancement of Science, the U.S. National Institute on Aging (U01\_AG09740-13S2, P01\_AG005842, P01\_AG08291, P30\_AG12815, R21\_AG025169, Y1-AG-4553-01, IAG\_BSR06-11, OGHA\_04-064, HHSN271201300071C) and from various national funding sources is gratefully acknowledged (see [www.share-project.org](http://www.share-project.org)).

### Data and Code Sharing

In accordance with good research practices<sup>83</sup>, the R code used to analyze the data is publicly available online<sup>84</sup>. A non-peer-reviewed version of this manuscript is publicly available online<sup>85</sup>. The SHARE dataset is available at <http://www.share-project.org/data-access.html> and the DOIs for the waves used in the current study are the following: <https://doi.org/10.6103/SHARE.w1.600>, <https://doi.org/10.6103/SHARE.w2.600>, <https://doi.org/10.6103/SHARE.w3.600>, <https://doi.org/10.6103/SHARE.w4.600>, <https://doi.org/10.6103/SHARE.w5.600>, <https://doi.org/10.6103/SHARE.w6.600>, <https://doi.org/10.6103/SHARE.w7.711>, <https://doi.org/10.6103/SHARE.w8cabeta.001>.

### Reporting Guidelines

This manuscript conforms to the STROBE guidelines for observational studies (<http://www.strobe-statement.org>)<sup>86</sup>.

### Acknowledgements

The authors are grateful to Dr. Olivier Renaud (University of Geneva, Switzerland) for his help in transcribing the R code of our statistical models into a scientific equation.

## REFERENCES

1. GBD 2019 Stroke Collaborators. Global, regional, and national burden of stroke and its risk factors, 1990-2019: a systematic analysis for the Global Burden of Disease Study 2019. *Lancet Neurol.* 2021;20(10):795-820. [https://doi.org/10.1016/S1474-4422\(21\)00252-0](https://doi.org/10.1016/S1474-4422(21)00252-0)
2. World Health Organization. Indicator metadata registry list: Disability-Adjusted Life Years (DALYs). Accessed January 29, 2022. <https://www.who.int/data/gho/indicator-metadata-registry/imr-details/158>
3. Carolei A, Marini C, Di Napoli M, et al. High stroke incidence in the prospective community-based L'Aquila registry (1994-1998). First year's results. *Stroke.* 1997;28(12):2500-2506. <https://doi.org/10.1161/01.str.28.12.2500>
4. Hartman-Maeir A, Soroker N, Ring H, Avni N, Katz N. Activities, participation and satisfaction one-year post stroke. *Disabil Rehabil.* 2007;29(7):559-566. <https://doi.org/10.1080/09638280600924996>
5. Leśniak M, Bak T, Czepiel W, Seniów J, Członkowska A. Frequency and prognostic value of cognitive disorders in stroke patients. *Dement Geriatr Cogn Disord.* 2008;26(4):356-363. <https://doi.org/10.1159/000162262>
6. Minelli C, Fen LF, Minelli DP. Stroke incidence, prognosis, 30-day, and 1-year case fatality rates in Matão, Brazil: a population-based prospective study. *Stroke.* 2007;38(11):2906-2911. <https://doi.org/10.1161/STROKEAHA.107.484139>
7. Skånér Y, Nilsson GH, Sundquist K, Hassler E, Krakau I. Self-rated health, symptoms of depression and general symptoms at 3 and 12 months after a first-ever stroke: a municipality-based study in Sweden. *BMC Fam Pract.* 2007;8:61. <https://doi.org/10.1186/1471-2296-8-61>
8. van de Port IG, Kwakkel G, van Wijk I, Lindeman E. Susceptibility to deterioration of mobility long-term after stroke: a prospective cohort study. *Stroke.* 2006;37(1):167-171. <https://doi.org/10.1161/01.STR.0000195180.69904.f2>
9. Sveen U, Wyller TB, Ljunggren AE, Bautz-Holter E. Predictive validity of early cognitive assessment in stroke rehabilitation, *Scand J Occup Ther.* 1996;3(1):20-27. <https://doi.org/10.3109/11038129609106678>
10. Ayerbe L, Ayis S, Rudd AG, Heuschmann PU, Wolfe CD. Natural history, predictors, and associations of depression 5 years after stroke: the South London Stroke Register. *Stroke.* 2011;42(7):1907-1911. <https://doi.org/10.1161/STROKEAHA.110.605808>
11. Dhamoon MS, Moon YP, Paik MC, et al. Long-term functional recovery after first ischemic stroke: the Northern Manhattan Study. *Stroke.* 2009;40(8):2805-2811. <https://doi.org/10.1161/STROKEAHA.109.549576>
12. Gil-Salcedo A, Dugravot A, Fayosse A, et al. Long-term evolution of functional limitations in stroke survivors compared with stroke-free adults: findings from 15 years of follow-up across 3 international surveys of aging. *Stroke.* 2022;53(1):228-237. <https://doi.org/10.1161/STROKEAHA.121.034534>
13. Willey JZ, Disla N, Moon YP, et al. Early depressed mood after stroke predicts long-term disability: the Northern Manhattan Stroke Study (NOMASS). *Stroke.* 2010;41(9):1896-1900. <https://doi.org/10.1161/STROKEAHA.110.583997>
14. Taub NA, Wolfe CD, Richardson E, Burney PG. Predicting the disability of first-time stroke sufferers at 1 year. 12-month follow-up of a population-based cohort in southeast England. *Stroke.* 1994;25(2):352-357. <https://doi.org/10.1161/01.str.25.2.352>

15. Wong GK, Lam SW, Wong A, et al. MoCA-assessed cognitive function and excellent outcome after aneurysmal subarachnoid hemorrhage at 1 year. *Eur J Neurol*. 2014;21(5):725-730. <https://doi.org/10.1111/ene.12363>
16. Appelros P. Characteristics of the Frenchay Activities Index one year after a stroke: a population-based study. *Disabil Rehabil*. 2007;29(10):785-790. <https://doi.org/10.1080/09638280600919715>
17. Mar J, Masjuan J, Oliva-Moreno J, et al. Outcomes measured by mortality rates, quality of life and degree of autonomy in the first year in stroke units in Spain. *Health Qual Life Outcomes*. 2015;13:36. <https://doi.org/10.1186/s12955-015-0230-8>
18. Broussy S, Saillour-Glenisson F, García-Lorenzo B, et al. Sequelae and quality of life in patients living at home 1 year after a stroke managed in stroke units. *Front Neurol*. 2019;10:907. <https://doi.org/10.3389/fneur.2019.00907>
19. Patel MD, Coshall C, Rudd AG, Wolfe CD. Cognitive impairment after stroke: clinical determinants and its associations with long-term stroke outcomes. *J Am Geriatr Soc*. 2002;50(4):700-706. <https://doi.org/10.1046/j.1532-5415.2002.50165.x>
20. Patel M, Coshall C, Rudd AG, Wolfe CD. Natural history of cognitive impairment after stroke and factors associated with its recovery. *Clin Rehabil*. 2003;17(2):158-166. <https://doi.org/10.1191/0269215503cr596oa>
21. Wolfe CD, Crichton SL, Heuschmann PU, et al. Estimates of outcomes up to ten years after stroke: analysis from the prospective South London Stroke Register. *PLoS Med*. 2011;8(5):e1001033. <https://doi.org/10.1371/journal.pmed.1001033>
22. Urbanek C, Gokel V, Safer A, et al. Low self-reported sports activity before stroke predicts poor one-year-functional outcome after first-ever ischemic stroke in a population-based stroke register. *BMC Neurol*. 2018;18(1):181. <https://doi.org/10.1186/s12883-018-1189-y>
23. Jokinen H, Melkas S, Ylikoski R, et al. Post-stroke cognitive impairment is common even after successful clinical recovery. *Eur J Neurol*. 2015;22(9):1288-1294. <https://doi.org/10.1111/ene.12743>
24. López-Cancio E, Jovin TG, Cobo E, et al. Endovascular treatment improves cognition after stroke: a secondary analysis of REVASCAT trial. *Neurology*. 2017;88(3):245-251. <https://doi.org/10.1212/WNL.0000000000003517>
25. Santus G, Ranzenigo A, Caregnato R, Inzoli MR. Social and family integration of hemiplegic elderly patients 1 year after stroke. *Stroke*. 1990;21(7):1019-1022. <https://doi.org/10.1161/01.str.21.7.1019>
26. Verhoeven CL, Post MW, Schiemanck SK, van Zandvoort MJ, Vrancken PH, van Heugten CM. Is cognitive functioning 1 year poststroke related to quality of life domain? *J Stroke Cerebrovasc Dis*. 2011;20(5):450-458. <https://doi.org/10.1016/j.jstrokecerebrovasdis.2010.02.018>
27. Wafa HA, Wolfe CDA, Bhalla A, Wang Y. Long-term trends in death and dependence after ischaemic strokes: a retrospective cohort study using the South London Stroke Register (SLSR). *PLoS Med*. 2020;17(3):e1003048. <https://doi.org/10.1371/journal.pmed.1003048>
28. de Campos LM, Martins BM, Cabral NL, et al. How many patients become functionally dependent after a stroke? A 3-year population-based study in Joinville, Brazil. *PLoS One*. 2017;12(1):e0170204. <https://doi.org/10.1371/journal.pone.0170204>
29. Rejnö Å, Nasic S, Bjälkefur K, Bertholds E, Jood K. Changes in functional outcome over five years after stroke. *Brain Behav*. 2019;9(6):e01300. <https://doi.org/10.1002/brb3.1300>

30. Rist PM, Capistrant BD, Mayeda ER, Liu SY, Glymour MM. Physical activity, but not body mass index, predicts less disability before and after stroke. *Neurology*. 2017;88(18):1718-1726. <https://doi.org/10.1212/WNL.0000000000003888>
31. Viktorisson A, Reinholdsson M, Danielsson A, Palstam A, S Sunnerhagen K. Pre-stroke physical activity in relation to post-stroke outcomes - linked to the International Classification of Functioning, Disability and Health (ICF): A scoping review. *J Rehabil Med*. 2022;54:jrm00251. <https://doi.org/10.2340/jrm.v53.51>
32. Ursin MH, Ihle-Hansen H, Fure B, Tveit A, Bergland A. Effects of premorbid physical activity on stroke severity and post-stroke functioning. *J Rehabil Med*. 2015;47(7):612-617. <https://doi.org/10.2340/16501977-1972>
33. Deplanque D, Masse I, Lefebvre C, Libersa C, Leys D, Bordet R. Prior TIA, lipid-lowering drug use, and physical activity decrease ischemic stroke severity. *Neurology*. 2006;67(8):1403-1410. <https://doi.org/10.1212/01.wnl.0000240057.71766.71>
34. Stroud N, Mazwi TM, Case LD, et al. Prestroke physical activity and early functional status after stroke. *J Neurol Neurosurg Psychiatry*. 2009;80(9):1019-1022. <https://doi.org/10.1136/jnnp.2008.170027>
35. Wen CP, Liu CH, Jeng JS, et al. Pre-stroke physical activity is associated with fewer post-stroke complications, lower mortality and a better long-term outcome. *Eur J Neurol*. 2017;24(12):1525-1531. <https://doi.org/10.1111/ene.13463>
36. Ricciardi AC, López-Cancio E, Pérez de la Ossa N, et al. Prestroke physical activity is associated with good functional outcome and arterial recanalization after stroke due to a large vessel occlusion. *Cerebrovasc Dis*. 2014;37(4):304-311. <https://doi.org/10.1159/000360809>
37. Krarup LH, Truelsen T, Gluud C, et al. Prestroke physical activity is associated with severity and long-term outcome from first-ever stroke. *Neurology*. 2008;71(17):1313-1318. <https://doi.org/10.1212/01.wnl.0000327667.48013.9f>
38. Morovatdar N, Di Napoli M, Stranges S, et al. Regular physical activity postpones age of occurrence of first-ever stroke and improves long-term outcomes. *Neurol Sci*. 2021;42(8):3203-3210. <https://doi.org/10.1007/s10072-020-04903-7>
39. Rist PM, Lee IM, Kase CS, Gaziano JM, Kurth T. Physical activity and functional outcomes from cerebral vascular events in men. *Stroke*. 2011;42(12):3352-3356. <https://doi.org/10.1161/STROKEAHA.111.619544>
40. Damsbo AG, Mortensen JK, Kraglund KL, Johnsen SP, Andersen G, Blauenfeldt RA. Prestroke physical activity and poststroke cognitive performance. *Cerebrovasc Dis*. 2020;49(6):632-638. <https://doi.org/10.1159/000511490>
41. Decourcelle A, Moulin S, Sibon I, et al. Influence of previous physical activity on the outcome of patients treated by thrombolytic therapy for stroke. *J Neurol*. 2015;262(11):2513-2519. <https://doi.org/10.1007/s00415-015-7875-4>
42. Wolfe CD, Taub NA, Woodrow EJ, Burney PG. Assessment of scales of disability and handicap for stroke patients. *Stroke*. 1991;22(10):1242-1244. <https://doi.org/10.1161/01.str.22.10.1242>
43. Szuhany KL, Bugatti M, Otto MW. A meta-analytic review of the effects of exercise on brain-derived neurotrophic factor. *J Psychiatr Res*. 2015;60:56-64. <https://doi.org/10.1016/j.jpsychires.2014.10.003>
44. Marin Bosch B, Bringard A, Logrieco MG, Lauer E, Imobersteg N, Thomas A, Ferretti G, Schwartz S, Igloi K. A single session of moderate intensity exercise influences memory,



- endocannabinoids and brain derived neurotrophic factor levels in men. *Sci Rep*. 2021;11(1):14371. <https://doi.org/10.1038/s41598-021-93813-5>
45. Börsch-Supan A, Brandt M, Hunkler C, et al. Data Resource Profile: the Survey of Health, Ageing and Retirement in Europe (SHARE). *Int J Epidemiol*. 2013;42(4):992-1001. <https://doi.org/10.1093/ije/dyt088>
  46. Landös A, von Arx M, Cheval B, et al. Childhood socioeconomic circumstances and disability trajectories in older men and women: a European cohort study. *Eur J Public Health*. 2019;29(1):50-58. <https://doi.org/10.1093/eurpub/cky166>
  47. Boisgontier MP, Orsholits D, von Arx M, et al. Adverse childhood experiences, depressive symptoms, functional dependence, and physical activity: a moderated mediation model. *J Phys Act Health*. 2020;17(8):790-799. <https://doi.org/10.1123/jpah.2019-0133>
  48. Cheval B, Maltagliati S, Saoudi I, Fessler L, Farajzadeh A, Sieber S, Cullati S, Boisgontier MP. Physical activity mediates the effect of education on mental health trajectories in older age. *J Affect Disord*. 2023;336:64-73. <https://doi.org/10.1016/j.jad.2023.05.052>
  49. Cheval B, Orsholits D, Sieber S, Courvoisier D, Cullati S, Boisgontier MP. Relationship between decline in cognitive resources and physical activity. *Health Psychol*. 2020;39(6):519-528. <https://doi.org/10.1037/hea0000857>
  50. Cheval B, Rebar AL, Miller MW, Sieber S, Orsholits D, Baranyi G, Courvoisier D, Cullati S, Sander D, Chalabaev A, Boisgontier MP. Cognitive resources moderate the adverse impact of poor perceived neighborhood conditions on self-reported physical activity of older adults. *Prev Med*. 2019;126:105741. <https://doi.org/10.1016/j.ypmed.2019.05.029>
  51. Cheval B, Saoudi I, Maltagliati S, Fessler L, Farajzadeh A, Sieber S, Cullati S, Boisgontier MP. Initial status and change in cognitive function mediate the association between academic education and physical activity in adults over 50 years of age. *Psychol Aging*. 2023;38(6):494-507. <https://doi.org/10.1037/pag0000749>
  52. Cheval B, Sieber S, Guessous I, Orsholits D, Courvoisier DS, Kliegel M, Stringhini S, Swinnen SP, Burton-Jeangros C, Cullati S, Boisgontier MP. Effect of early- and adult-life socioeconomic circumstances on physical inactivity. *Med Sci Sports Exerc*. 2018;50(3):476-485. <https://doi.org/10.1249/MSS.0000000000001472>
  53. Beenackers MA, Kamphuis CB, Giskes K, et al. Socioeconomic inequalities in occupational, leisure-time, and transport related physical activity among European adults: a systematic review. *Int J Behav Nutr Phys Act*. 2012;9:116. <https://doi.org/10.1186/1479-5868-9-116>
  54. Clouston SA, Richards M, Cadar D, Hofer SM. Educational inequalities in health behaviors at midlife: is there a role for early-life cognition? *J Health Soc Behav*. 2015;56(3):323-340. <https://doi.org/10.1177/0022146515594188>
  55. Droomers M, Schrijvers CT, Mackenbach JP. Educational level and decreases in leisure time physical activity: predictors from the longitudinal GLOBE study. *J Epidemiol Community Health*. 2001;55(8):562-568. <https://doi.org/10.1136/jech.55.8.562>
  56. Kari JT, Viinikainen J, Böckerman P, et al. Education leads to a more physically active lifestyle: evidence based on Mendelian randomization. *Scand J Med Sci Sports*. 2020;30(7):1194-1204. <https://doi.org/10.1111/sms.13653>
  57. O'Donoghue G, Kennedy A, Puggina A, et al. Socio-economic determinants of physical activity across the life course: a "DEterminants of DIet and Physical ACTivity" (DEDIPAC) umbrella literature review. *PLoS One*. 2018;13(1):e0190737. <https://doi.org/10.1371/journal.pone.0190737>

58. Ho DE, Imai K, King G, Stuart EA. Matching as nonparametric preprocessing for reducing model dependence in parametric causal inference. *Political Anal.* 2007;15(3):199-236. <https://doi.org/10.1093/pan/mpi013>
59. Ho D, Imai K, King G, Stuart E, Whitworth A, Greife N. *MatchIt: Nonparametric preprocessing for parametric causal inference* [R package]. Version 4.5.4; 2023. <https://cran.r-project.org/web/packages/MatchIt/MatchIt.pdf>
60. Boisgontier MP, Cheval B. The anova to mixed model transition. *Neurosci Biobehav Rev.* 2016;68:1004-1005. <https://doi.org/10.1016/j.neubiorev.2016.05.034>
61. Lohse K, Kozłowski A, Strube MJ. Model specification in mixed-effects models: a focus on random effects. *Commun Kinesiol.* 2023;1(5):1-28. <https://doi.org/10.51224/cik.2023.52>
62. R Core Team. *R: a language and environment for statistical computing*. Vienna, Austria: R Foundation for Statistical Computing; 2021. <https://www.r-project.org>
63. Bates D, Maechler M, Bolker B, Walker S, Christensen RHB, Singmann H, Dai B, Scheipl F, Grothendieck G, Green P, Fox J, Bauer A, Krivitsky PN. *lme4: linear mixed-effects models using 'eigen' and S4* [R package]. Version 1.1-27.1; 2021. <https://cran.r-project.org/web/packages/lme4/lme4.pdf>
64. Kuznetsova A, Brockhoff, PB, Christensen, RHB. *lmerTest: tests in linear mixed effects models* [R package]. Version 3.1-3; 2016. <https://cran.r-project.org/web/packages/lmerTest/lmerTest.pdf>
65. Bates D, Mächler M, Bolker B, Walker S. Fitting linear mixed-effects models using lme4. *J Stat Softw.* 2015;67:1-48. <https://doi.org/10.18637/jss.v067.i01>
66. Bovim MR, Indredavik B, Hokstad A, Cumming T, Bernhardt J, Askim T. Relationship between pre-stroke physical activity and symptoms of post-stroke anxiety and depression: an observational study. *J Rehabil Med.* 2019;51(10):755-760. <https://doi.org/10.2340/16501977-2610>
67. Viktorisson A, Andersson EM, Lundström E, Sunnerhagen KS. Levels of physical activity before and after stroke in relation to early cognitive function. *Sci Rep.* 2021;11(1):9078. <https://doi.org/10.1038/s41598-021-88606-9>
68. Cotman CW, Berchtold NC, Christie LA. Exercise builds brain health: key roles of growth factor cascades and inflammation. *Trends Neurosci.* 2007;30(9):464-472. <https://doi.org/10.1016/j.tins.2007.06.011>
69. Gibbons TD, Cotter JD, Ainslie PN, Abraham WC, Mockett BG, Campbell HA, Jones EMW, Jenkins EJ, Thomas KN. Fasting for 20 h does not affect exercise-induced increases in circulating BDNF in humans. *J Physiol.* 2023;601(11):2121-2137. <https://doi.org/10.1113/JP283582>
70. Hillman CH, Erickson KI, Kramer AF. Be smart, exercise your heart: exercise effects on brain and cognition. *Nat Rev Neurosci.* 2008;9(1):58-65. <https://doi.org/10.1038/nrn2298>
71. Hadidi N, Treat-Jacobson DJ, Lindquist R. Poststroke depression and functional outcome: a critical review of literature. *Heart Lung.* 2009;38(2):151-162. <https://doi.org/10.1016/j.hrtlng.2008.05.002>
72. Lai SM, Duncan PW, Keighley J, Johnson D. Depressive symptoms and independence in BADL and IADL. *J Rehabil Res Dev.* 2002;39(5):589-596.
73. Engstad T, Bonna KH, Viitanen M. Validity of self-reported stroke: the Tromso Study. *Stroke.* 2000;31(7):1602-1607. <https://doi.org/10.1161/01.str.31.7.1602>

74. van den Akker M, van Steenkiste B, Krutwagen E, Metsmakers JF. Disease or no disease? Disagreement on diagnoses between self-reports and medical records of adult patients. *Eur J Gen Pract*. 2015;21(1):45-51. <https://doi.org/10.3109/13814788.2014.907266>
75. Lee PH, Macfarlane DJ, Lam TH, Stewart SM. Validity of the International Physical Activity Questionnaire Short Form (IPAQ-SF): a systematic review. *Int J Behav Nutr Phys Act*. 2011;8:115. <https://doi.org/10.1186/1479-5868-8-115>
76. Prince SA, Adamo KB, Hamel ME, Hardt J, Connor Gorber S, Tremblay M. A comparison of direct versus self-report measures for assessing physical activity in adults: a systematic review. *Int J Behav Nutr Phys Act*. 2008;5:56. <https://doi.org/10.1186/1479-5868-5-56>
77. Dowd KP, Szeklicki R, Minetto MA, Murphy MH, Polito A, Ghigo E, van der Ploeg H, Ekelund U, Maciaszek J, Stemplewski R, Tomczak M, Donnelly AE. A systematic literature review of reviews on techniques for physical activity measurement in adults: a DEDIPAC study. *Int J Behav Nutr Phys Act*. 2018;15(1):15. <https://doi.org/10.1186/s12966-017-0636-2>
78. Boisgontier MP, Iversen MD. Physical inactivity: a behavioral disorder in the physical therapist's scope of practice. *Phys Ther*. 2020;100(5):743-746. <https://doi.org/10.1093/ptj/pzaa011>
79. APTA House of Delegates. Physical therapist's scope of practice HOD P06-17-09-16/HOD P06-17-08-07. Accessed February 15, 2024. <https://www.apta.org/contentassets/a400d547ca63438db1349c4a69bf7ead/position-pt-scope-practice.pdf>
80. Shirley D, van der Ploeg HP, Bauman AE. Physical activity promotion in the physical therapy setting: perspectives from practitioners and students. *Phys Ther*. 2010;90:1311–1322. <https://doi.org/10.2522/ptj.20090383>
81. Allen L, O'Connell A, Kiermer V. How can we ensure visibility and diversity in research contributions? How the Contributor Role Taxonomy (CRediT) is helping the shift from authorship to contributorship. *Learn Publ*. 2019;32(1):71–74. <https://doi.org/10.1002/leap.1210>
82. Brand A, Allen L, Altman M, Hlava M, Scott J. Beyond authorship: attribution, contribution, collaboration, and credit. *Learn Publ*. 2015;28:151–155. <https://doi.org/10.1087/20150211>
83. Boisgontier MP. Research integrity requires to be aware of good and questionable research practices. *Eur Rehabil J*. 2022;2(1):1–3. <https://doi.org/10.52057/erj.v2i1.24>
84. Orsholits D, van Allen Z, Boisgontier MP. Pre-stroke physical activity matters for functional limitations (v1.2). *Zenodo*. 2024. <https://doi.org/10.5281/zenodo.10668778>
85. van Allen Z, Orsholits D, Boisgontier MP. Functional limitations in stroke survivors: pre-stroke physical activity matters. *MedRxiv*. 2023. <https://doi.org/10.1101/2023.09.14.23295576>
86. von Elm E, Altman DG, Egger M, et al. The strengthening the reporting of observational studies in epidemiology (STROBE) statement: guidelines for reporting observational studies. *PLoS Med*. 2007;4(10):e296. <https://doi.org/10.1371/journal.pmed.0040296>

## SUPPLEMENTAL MATERIAL

### **Pre-Stroke Physical Activity Matters for Functional Limitations: A Longitudinal Case-Control Study of 12,860 Participants**

Zack van Allen, Dan Orsholits, Matthieu P. Boisgontier

**Table S1.** Stroke survivors with at least slight dependency in activities of daily living (ADLs) at 1-year follow-up.

**Table S2.** Stroke survivors with at least moderate dependency in activities of daily living (ADLs) at 1-year follow-up.

**Table S3.** Stroke survivors with severe or total dependency in activities of daily living (ADLs) at 1-year follow-up.

**Table S4.** Stroke survivors who are moderately active in instrumental activities of daily living (IADLs) at 1-year follow-up.

**Table S5.** Stroke survivors who are inactive in instrumental activities of daily living (IADLs) at 1-year follow-up.

**Table S6.** Activities of daily living (ADLs) and instrumental activities of daily living (IADLs) counts for stroke survivors and stroke-free adults. Counts reflect the number of I/ADL limitations reported.

**Table S7.** Frequency of moderate and vigorous physical activity in stroke survivors and stroke-free adults at baseline.

**Table S8.** Counts of physically active and inactive participants in stroke survivors and stroke-free adults.

**Table S9.** Results of the sensitivity analyses testing the interaction between stroke-related status and physical activity (“hardly ever or never” vs. “at least once a month”) on limitations in activities of daily living (ADLs) and instrumental activities of daily living (IADLs).

**Figure S1.** Result of the sensitivity analysis showing the effect of physical activity (“Hardly ever or never” vs. “At least once a month”) on limitations in activities of daily living (ADLs) and instrumental activities of daily living (IADLs) in stroke survivors and matched stroke-free adults over time.

**Table S1.** Stroke survivors with at least slight dependency in activities of daily living (ADLs) at 1-year follow-up

| Study                    | Outcome Measure        | Threshold | Sample Size (n) | Dependent Survivors (%) |
|--------------------------|------------------------|-----------|-----------------|-------------------------|
| Appelros (2007)          | Barthel Index          | <20/20    | 246             | 39.0                    |
| Ayerbe (2011)            | Barthel Index          | <20/20    | 1732            | 67.0                    |
| Carolei (1997)           | Barthel Index          | <20/20    | 517             | 61.7                    |
| Dhamoon (2009)           | Barthel Index          | <95/100   | 525             | 48.1                    |
| Gil-Salcedo (2022)       | Modified Ranking Scale | >1/6      | 3718            | 63.8                    |
| Hartman-Macir (2007)     | FIM motor scale        | <91/91    | 56              | 68.0                    |
| Leśniak (2008)           | Barthel Index          | <20/20    | 80              | 43.7                    |
| Mar (2015)               | Barthel Index          | <100/100  | 250             | 47.2                    |
| Minelli (2007)           | Barthel Index          | <100/100  | 79              | 57.0                    |
| Skánér (2007)            | Katz ADL               | <6/6      | 135             | 31.9                    |
| Sveen (1996)             | Barthel Index          | <20/20    | 74              | 58.1                    |
| Taub (1994)              | Barthel Index          | <20/20    | 225             | 34.0                    |
| van de Port (2006)       | Barthel Index          | <19/20    | 264             | 40.1                    |
| Willey (2010)            | Barthel Index          | <95/100   | 246             | 44.7                    |
| Wong (2014)              | Modified Ranking Scale | >1/6      | 194             | 64.4                    |
| <b>Total n</b>           |                        |           | <b>8341</b>     |                         |
| <b>Weighted mean (%)</b> |                        |           |                 | <b>59.2</b>             |

Note. FIM = Functional Independent Measure.

**Table S2.** Stroke survivors with at least moderate dependency in activities of daily living (ADLs) at 1-year follow-up

| Study                    | Outcome Measure        | Threshold | Sample Size (n) | Dependent Survivors (%) |
|--------------------------|------------------------|-----------|-----------------|-------------------------|
| Appelros (2007)          | Barthel Index          | <15/20    | 246             | 31.2                    |
| Broussy (2019)           | Modified Ranking Scale | >2/6      | 161             | 29.6                    |
| De Campos (2017)         | Modified Ranking Scale | >2/6      | 287             | 16.4                    |
| Jokinen (2015)           | Modified Ranking Scale | >2/6      | 364             | 44.0                    |
| López-Cancio (2017)      | Modified Ranking Scale | >2/6      | 143             | 53.8                    |
| Mar (2015)               | Barthel Index          | <90/100   | 250             | 40.4                    |
| Patel (2002)             | Barthel Index          | <15/20    | 619             | 36.2                    |
| Patel (2003)             | Barthel Index          | <15/20    | 136             | 36.0                    |
| Santus (1990)            | Barthel Index          | <75/100   | 76              | 46.1                    |
| Taub (1994)              | Barthel Index          | <15/20    | 225             | 11.0                    |
| Urbanek (2018)           | Modified Ranking Scale | >2/6      | 1119            | 41.6                    |
| Verhoeven (2011)         | Barthel Index          | <18/20    | 92              | 38.0                    |
| Wafa (2020)              | Barthel Index          | <15/20    | 1961            | 24.1                    |
| Wolfe (2011)             | Barthel Index          | <15/20    | 1578            | 13.1                    |
| Wong (2014)              | Modified Ranking Scale | >2/6      | 194             | 33.0                    |
| <b>Total (n)</b>         |                        |           | <b>7451</b>     |                         |
| <b>Weighted mean (%)</b> |                        |           |                 | <b>32.9</b>             |

**Table S3.** Stroke survivors with severe or total dependency in activities of daily living (ADLs) at 1-year follow-up

| Study                    | Outcome Measure        | Threshold | Sample Size (n) | Dependent Survivors (%) |
|--------------------------|------------------------|-----------|-----------------|-------------------------|
| Appelros (2007)          | Barthel Index          | <12/20    | 246             | 16.0                    |
| Broussy (2019)           | Barthel Index          | <12/20    | 161             | 12.7                    |
| Dhamoon (2009)           | Barthel Index          | <60/100   | 525             | 18.0                    |
| Gil-Salcedo (2022)       | Modified Ranking Scale | >3/6      | 3718            | 27.3                    |
| Mar (2015)               | Barthel Index          | <60/100   | 250             | 20.4                    |
| Patel (2002)             | Barthel Index          | <10/20    | 619             | 9.4                     |
| Patel (2003)             | Barthel Index          | <10/20    | 136             | 15.4                    |
| Willey (2010)            | Barthel Index          | <60/100   | 246             | 15.9                    |
| Wong (2014)              | Modified Ranking Scale | >3/6      | 194             | 19.6                    |
| <b>Total n</b>           |                        |           | <b>6095</b>     |                         |
| <b>Weighted mean (%)</b> |                        |           |                 | <b>22.6</b>             |



**Table S4.** Stroke survivors who are moderately active in instrumental activities of daily living (IADLs) at 1-year follow-up.

| Study                    | Outcome Measure           | Threshold | Sample Size (n) | Dependent Survivors (%) |
|--------------------------|---------------------------|-----------|-----------------|-------------------------|
| Appelros (2007)          | Frenchay Activities Index | <30/45    | 246             | 78.8                    |
| Ayerbe (2011)            | Frenchay Activities Index | <30/45    | 1403            | 79.7                    |
| Patel (2002)             | Frenchay Activities Index | <30/45    | 619             | 85.7                    |
| Patel (2003)             | Frenchay Activities Index | <30/45    | 136             | 88.2                    |
| Sveen (1996)             | Frenchay Activities Index | <29/45    | 74              | 75.6                    |
| <b>Total n</b>           |                           |           | <b>2478</b>     |                         |
| <b>Weighted mean (%)</b> |                           |           |                 | <b>81.5</b>             |

**Table S5.** Stroke survivors who are inactive in instrumental activities of daily living (IADLs) at 1-year follow-up.

| Study                    | Outcome Measure           | Threshold | Sample Size (n) | Dependent Survivors (%) |
|--------------------------|---------------------------|-----------|-----------------|-------------------------|
| Appelros (2007)          | Frenchay Activities Index | <15/45    | 246             | 46.3                    |
| Patel (2002)             | Frenchay Activities Index | <15/45    | 619             | 40.4                    |
| Patel (2003)             | Frenchay Activities Index | <15/45    | 136             | 72.7                    |
| van de Port (2006)       | Frenchay Activities Index | <15/45    | 264             | 35.2                    |
| Wolfe (2011)             | Frenchay Activities Index | <15/45    | 1578            | 38.8                    |
| <b>Total n</b>           |                           |           | <b>2843</b>     |                         |
| <b>Weighted mean (%)</b> |                           |           |                 | <b>41.1</b>             |

**Table S6.** Activities of daily living (ADLs) and instrumental activities of daily living (IADLs) counts for stroke survivors and stroke-free adults. Counts reflect the number of I/ADL limitations reported.

| Activities of Daily Living (ADLs) |        |        |        |        |        |        |        |        |
|-----------------------------------|--------|--------|--------|--------|--------|--------|--------|--------|
| Stroke Survivors                  |        |        |        |        |        |        |        |        |
| ADL                               | Wave 1 | Wave 2 | Wave 3 | Wave 4 | Wave 5 | Wave 6 | Wave 7 | Wave 8 |
| 0                                 | 929    | 1162   | NA     | 1287   | 1389   | 1307   | 1115   | 795    |
| 1                                 | 68     | 92     | NA     | 151    | 166    | 187    | 188    | 139    |
| 2                                 | 20     | 36     | NA     | 62     | 89     | 125    | 126    | 70     |
| 3                                 | 11     | 23     | NA     | 48     | 45     | 58     | 59     | 57     |
| 4                                 | 4      | 10     | NA     | 22     | 33     | 40     | 53     | 36     |
| 5                                 | 2      | 7      | NA     | 31     | 29     | 50     | 51     | 45     |
| 6                                 | 2      | 11     | NA     | 34     | 57     | 72     | 86     | 79     |
| NA                                | 1125   | 820    | 2161   | 526    | 353    | 322    | 483    | 940    |
| Stroke-Free Adults                |        |        |        |        |        |        |        |        |
| ADL                               | Wave 1 | Wave 2 | Wave 3 | Wave 4 | Wave 5 | Wave 6 | Wave 7 | Wave 8 |
| 0                                 | 4627   | 5964   | NA     | 7258   | 7770   | 7685   | 7077   | 4974   |
| 1                                 | 259    | 391    | NA     | 624    | 636    | 734    | 694    | 491    |
| 2                                 | 91     | 130    | NA     | 210    | 257    | 316    | 289    | 207    |
| 3                                 | 36     | 59     | NA     | 117    | 141    | 130    | 150    | 125    |
| 4                                 | 29     | 40     | NA     | 70     | 94     | 111    | 81     | 82     |
| 5                                 | 3      | 29     | NA     | 53     | 79     | 84     | 102    | 55     |
| 6                                 | 16     | 21     | NA     | 71     | 78     | 95     | 130    | 105    |
| NA                                | 5744   | 4171   | 10805  | 2402   | 1750   | 1650   | 2282   | 4766   |

  

| Instrumental Activities of Daily Living (ADLs) |        |        |        |        |        |        |        |        |
|------------------------------------------------|--------|--------|--------|--------|--------|--------|--------|--------|
| Stroke Survivors                               |        |        |        |        |        |        |        |        |
| IADL                                           | Wave 1 | Wave 2 | Wave 3 | Wave 4 | Wave 4 | Wave 6 | Wave 7 | Wave 8 |
| 0                                              | 869    | 1050   | NA     | 1158   | 1201   | 1091   | 931    | 625    |
| 1                                              | 104    | 154    | NA     | 203    | 233    | 272    | 216    | 154    |
| 2                                              | 31     | 63     | NA     | 103    | 113    | 130    | 140    | 105    |
| 3                                              | 14     | 23     | NA     | 48     | 66     | 93     | 100    | 67     |
| 4                                              | 9      | 13     | NA     | 26     | 58     | 67     | 73     | 68     |
| 5                                              | 6      | 10     | NA     | 29     | 39     | 57     | 60     | 52     |
| 6                                              | 1      | 15     | NA     | 23     | 31     | 49     | 57     | 41     |
| 7                                              | 2      | 13     | NA     | 45     | 67     | 80     | 101    | 109    |
| NA                                             | 1125   | 820    | 2161   | 526    | 353    | 322    | 483    | 940    |
| Stroke-Free Adults                             |        |        |        |        |        |        |        |        |
| IADL                                           | Wave 1 | Wave 2 | Wave 3 | Wave 4 | Wave 5 | Wave 6 | Wave 7 | Wave 8 |
| 0                                              | 4315   | 5490   | NA     | 6726   | 7109   | 6968   | 6291   | 4371   |
| 1                                              | 458    | 648    | NA     | 857    | 912    | 1016   | 945    | 720    |
| 2                                              | 157    | 239    | NA     | 351    | 387    | 444    | 437    | 289    |
| 3                                              | 63     | 108    | NA     | 153    | 205    | 248    | 247    | 193    |
| 4                                              | 30     | 64     | NA     | 104    | 150    | 180    | 190    | 139    |
| 5                                              | 14     | 38     | NA     | 71     | 95     | 97     | 160    | 104    |
| 6                                              | 10     | 23     | NA     | 48     | 73     | 74     | 97     | 77     |
| 7                                              | 14     | 24     | NA     | 93     | 124    | 128    | 156    | 146    |
| NA                                             | 5744   | 4171   | 10805  | 2402   | 1750   | 1650   | 2282   | 4766   |

**Table S7.** Frequency of moderate and vigorous physical activity in stroke survivors and stroke-free adults at baseline.

| Physical Activity Frequency | Stroke Survivors           |                            | Stroke-Free Adults         |                            |
|-----------------------------|----------------------------|----------------------------|----------------------------|----------------------------|
|                             | Moderate Physical Activity | Vigorous Physical Activity | Moderate Physical Activity | Vigorous Physical Activity |
| Hardly ever or never        | 258                        | 931                        | 1086                       | 4291                       |
| One to three times a month  | 127                        | 216                        | 575                        | 1050                       |
| Once a week                 | 274                        | 306                        | 1415                       | 1501                       |
| More than once a week       | 1500                       | 706                        | 7702                       | 3937                       |
| NA                          | 2                          | 2                          | 27                         | 26                         |

Notes. The question for assessing moderate physical activity was “How often do you engage in activities that require a low or moderate level of energy such as gardening, cleaning the car, or doing a walk?”. The question for assessing vigorous physical activity was “How often do you engage in vigorous physical activity, such as sports, heavy housework, or a job that involves physical labor?”

**Table S8.** Counts of physically active and inactive participants in stroke survivors and stroke-free adults.

| Type of Analysis     | Stroke Survivors    |                   | Stroke-Free Adults  |                   |
|----------------------|---------------------|-------------------|---------------------|-------------------|
|                      | Physically Inactive | Physically Active | Physically Inactive | Physically Active |
| Main Analyses        | 595                 | 1564              | 2720                | 8060              |
| Sensitivity Analyses | 1202                | 957               | 6343                | 4434              |

Notes. In the main analyses, participants who answered “more than once a week” to at least one of the questions were classified as physically active, whereas the other participants were classified as physically inactive. In the sensitivity analyses, participants who answered “hardly ever or never” to one of the two questions related to the level of physical activity were classified as physically inactive, whereas the other participants were classified as physically active.

**Table S9.** Results of the sensitivity analyses testing the interaction between stroke-related status and physical activity (hardly ever or never vs. at least once a month) on limitations in activities of daily living (ADLs) and instrumental activities of daily living (IADLs).

| Exposures                  | ADL                       |                         | IADL                      |                         |
|----------------------------|---------------------------|-------------------------|---------------------------|-------------------------|
|                            | b (95 CI)                 | p                       | b (95 CI)                 | p                       |
| Intercept                  | -0.563 (-0.653 to -0.474) | $< 2.0 \times 10^{-16}$ | -1.137 (-1.255 to -1.019) | $< 2.0 \times 10^{-16}$ |
| Stroke                     | -0.044 (-0.089 to 0.001)  | 0.056                   | -0.045 (-0.100 to 0.010)  | 0.107                   |
| Physical Activity          | 0.223 (0.198 to 0.247)    | $< 2.0 \times 10^{-16}$ | 0.317 (0.285 to 0.348)    | $< 2.0 \times 10^{-16}$ |
| Wave                       | 0.016 (0.005 to 0.027)    | 0.003                   | 0.017 (0.003 to 0.030)    | 0.015                   |
| Wave <sup>2</sup>          | 0.006 (0.005 to 0.008)    | $1.1 \times 10^{-14}$   | 0.013 (0.011 to 0.015)    | $< 2.0 \times 10^{-16}$ |
| Age                        | 0.007 (0.005 to 0.008)    | $< 2.0 \times 10^{-16}$ | 0.012 (0.011 to 0.014)    | $< 2.0 \times 10^{-16}$ |
| Sex                        | 0.063 (0.041 to 0.085)    | $3.0 \times 10^{-8}$    | 0.192 (0.164 to 0.221)    | $< 2.0 \times 10^{-16}$ |
| Education                  |                           |                         |                           |                         |
| Primary (vs. Secondary)    | 0.117 (0.091 to 0.142)    | $< 2.0 \times 10^{-16}$ | 0.224 (0.191 to 0.256)    | $< 2.0 \times 10^{-16}$ |
| Tertiary (vs. Secondary)   | -0.026 (-0.055 to 0.003)  | 0.074                   | -0.047 (-0.083 to -0.011) | 0.011                   |
| Chronic Conditions         | 0.113 (0.099 to 0.128)    | $< 2.0 \times 10^{-16}$ | 0.178 (0.160 to 0.196)    | $< 2.0 \times 10^{-16}$ |
| Stroke × Physical Activity | 0.084 (0.026 to 0.142)    | 0.004                   | 0.062 (-0.012 to 0.136)   | 0.098                   |
| Stroke × Wave              | 0.022 (-0.005 to 0.048)   | 0.109                   | 0.032 (0.000 to 0.065)    | 0.052                   |
| Stroke × Wave <sup>2</sup> | 0.014 (0.010 to 0.018)    | $7.9 \times 10^{-13}$   | 0.020 (0.015 to 0.025)    | $6.7 \times 10^{-15}$   |

Notes. 95 CI = 95% confidence interval, ADL = activities of daily living, IADL = instrumental activities of daily living

**Figure S1.** Result of the sensitivity analysis showing the effect of physical activity (PA; “Hardly ever or never” vs. “At least once a month”) on limitations in activities of daily living (ADLs) and instrumental activities of daily living (IADLs) in stroke survivors and matched stroke-free adults over time.

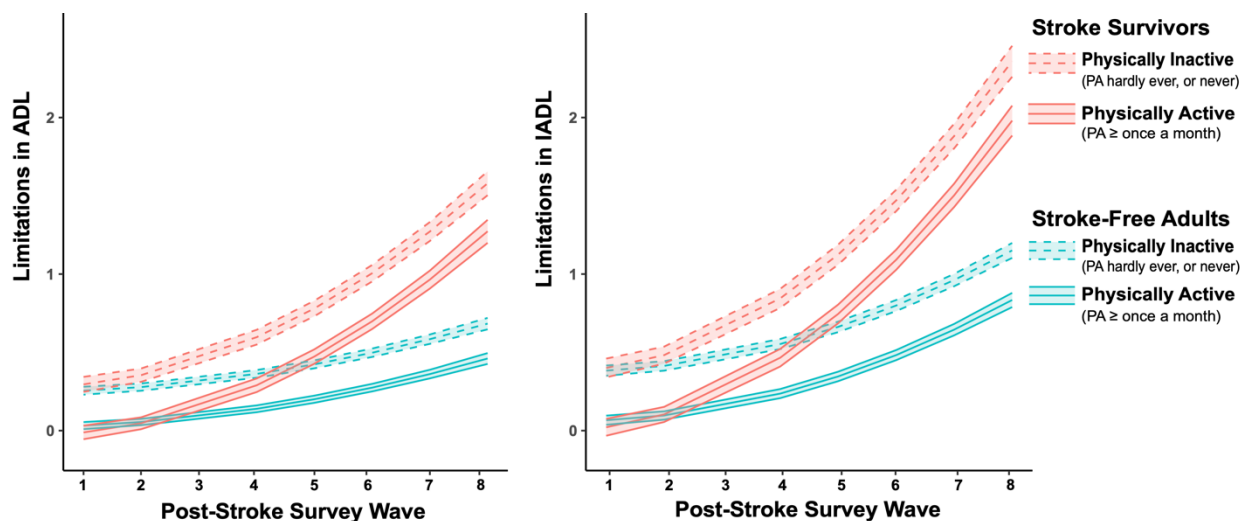

Source: https://medrxiv.org/content/10.1101/2023.09.14.23295576.full.pdf
